# Supplementary material
Source: HighWire-hosted journal article supplement (https://jnm.snmjournals.org/highwire/filestream/94832/field_highwire_adjunct_files/0/165720_Supplemental_Data.pdf)
Supplement: 165720_Supplemental_Data.pdf [file 165720_Supplemental_Data.pdf]

# 1. Reactions and Structures

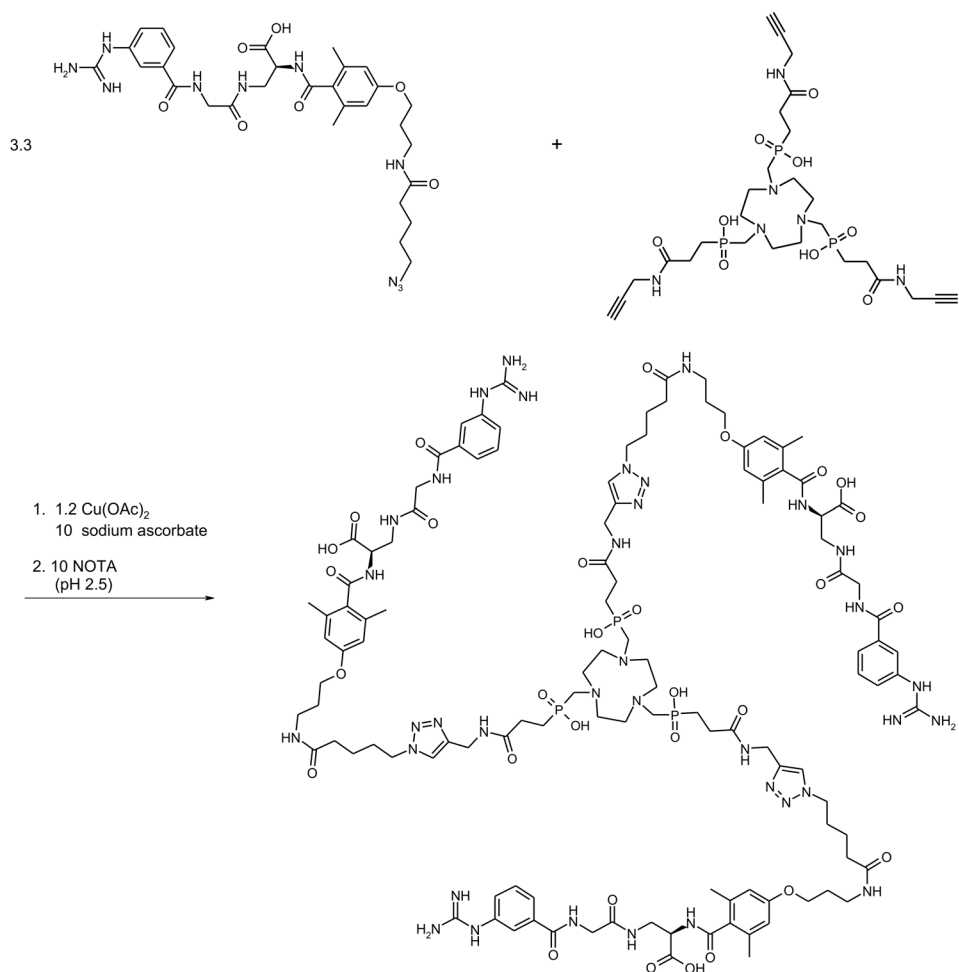

**Supplemental Scheme 1:** Synthesis of Aquibeptrin from TRAP(alkyne)<sub>3</sub> and an azide-functionalized  $\alpha_5\beta_1$ -integrin binding pseudopeptide.

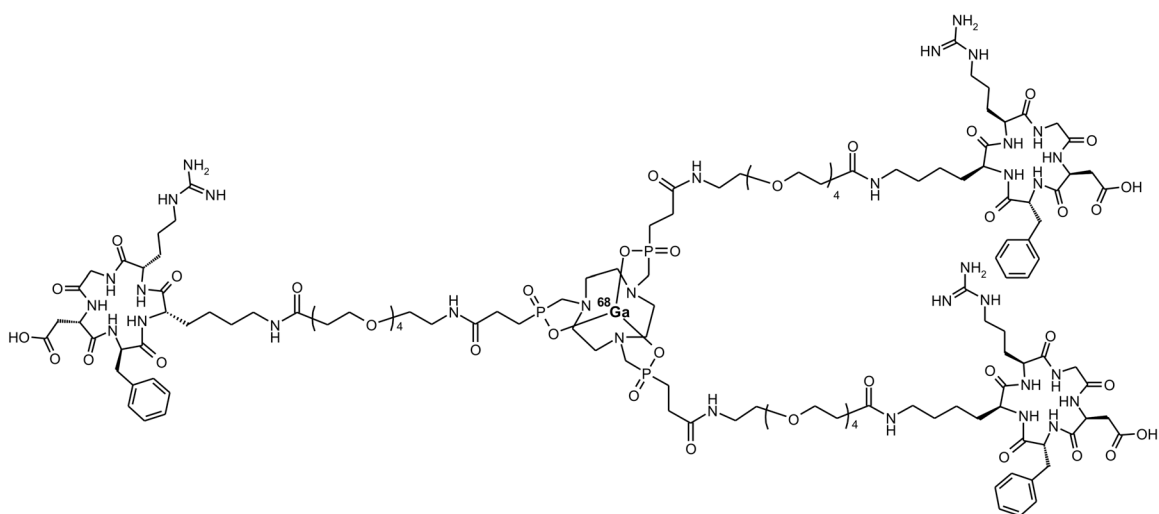

**Supplemental Scheme 2:** Structure of <sup>68</sup>Ga-Avebetrin.

## 2. Analytical and in-vivo data for Aquibepirin and $^{nat}\text{Ga}/^{68}\text{Ga}$ -Aquibepirin

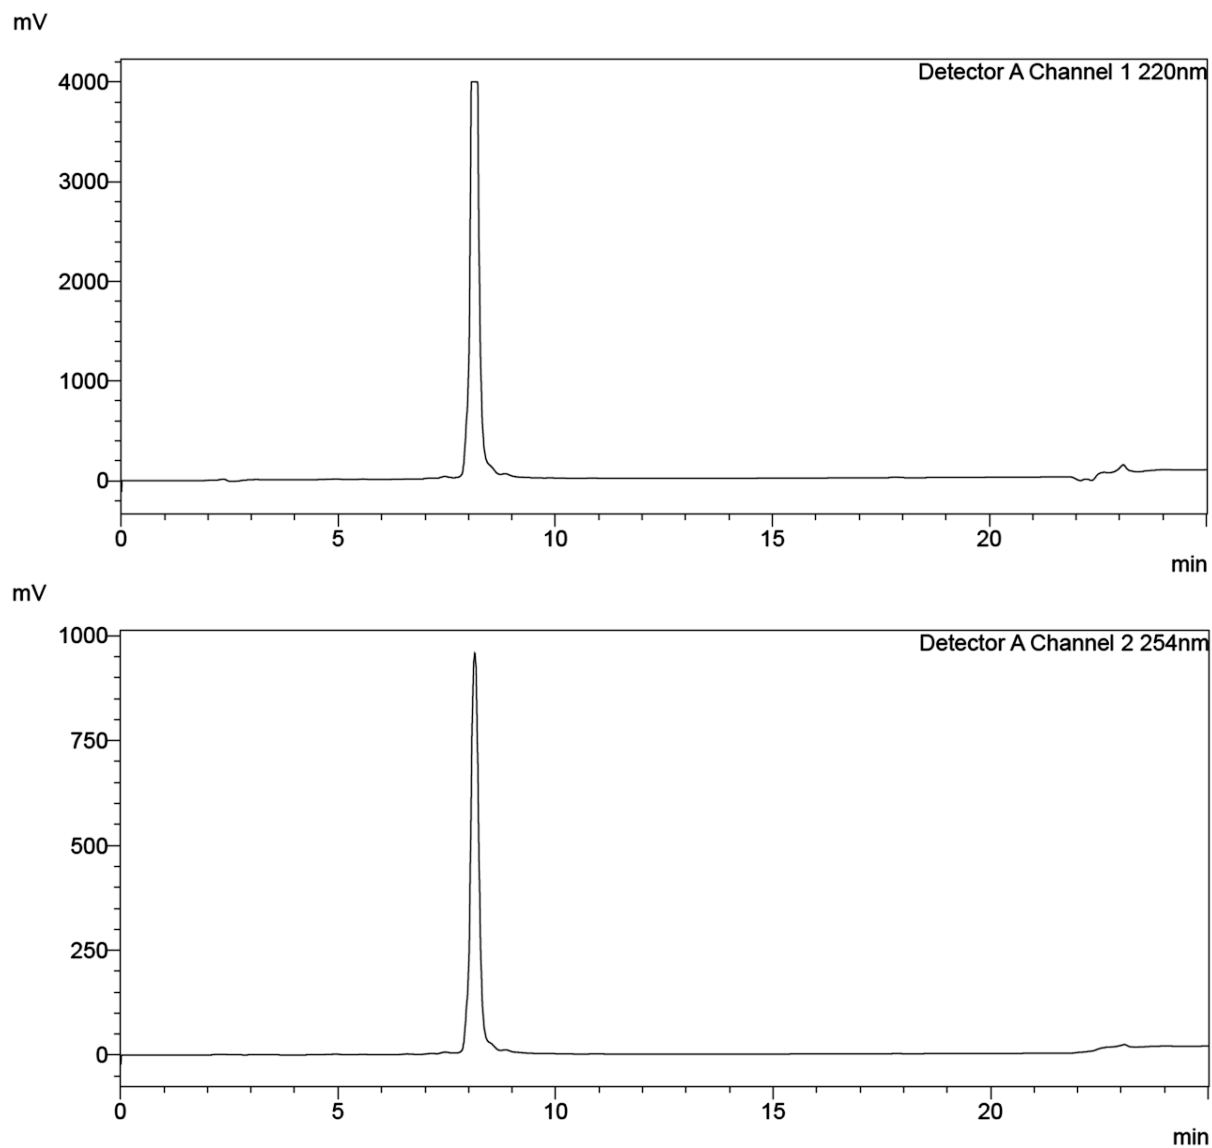

**Supplemental Figure 1:** HPLC chromatograms for Aquibepirin. Shimadzu HPLC system, column: Nucleosil 100, 5  $\mu\text{m}$ , RP-C18, 125  $\times$  4.6 mm; flow rate: 1 mL min $^{-1}$ ; gradient: 15–65 % MeCN in H $_2$ O (both containing 0.1 % trifluoroacetic acid) in 20 min.

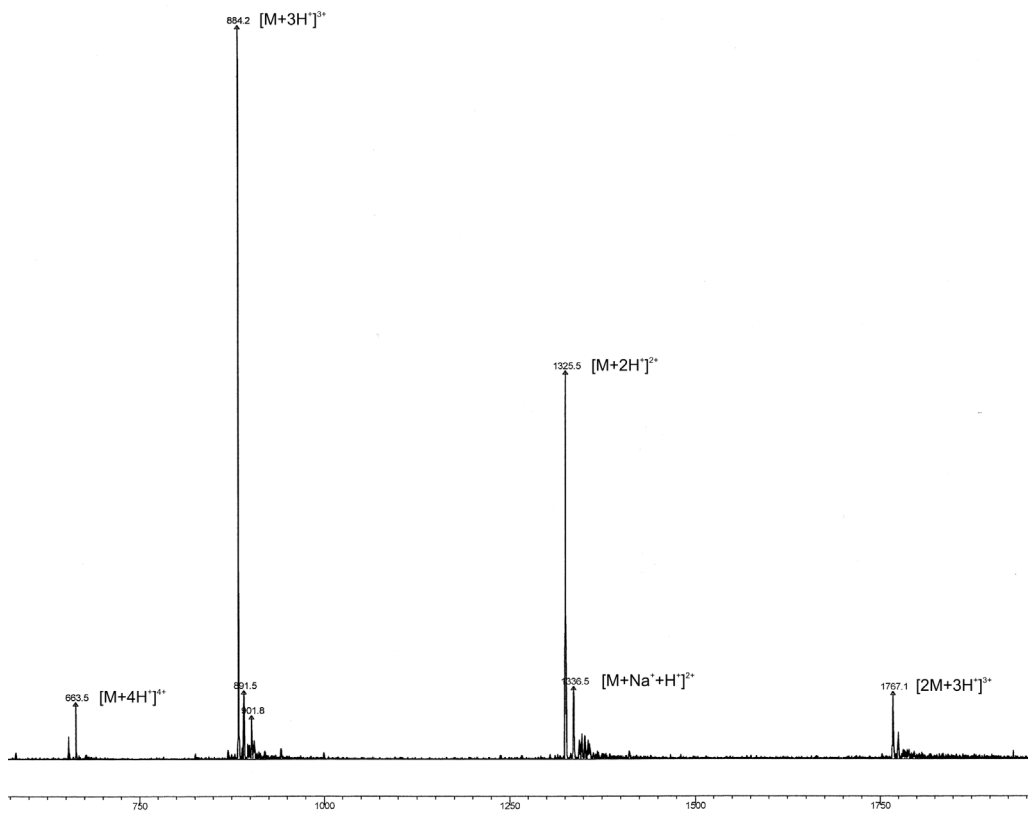

**Supplemental Figure 2:** MS (ESI, positive mode) for Aquibepirin

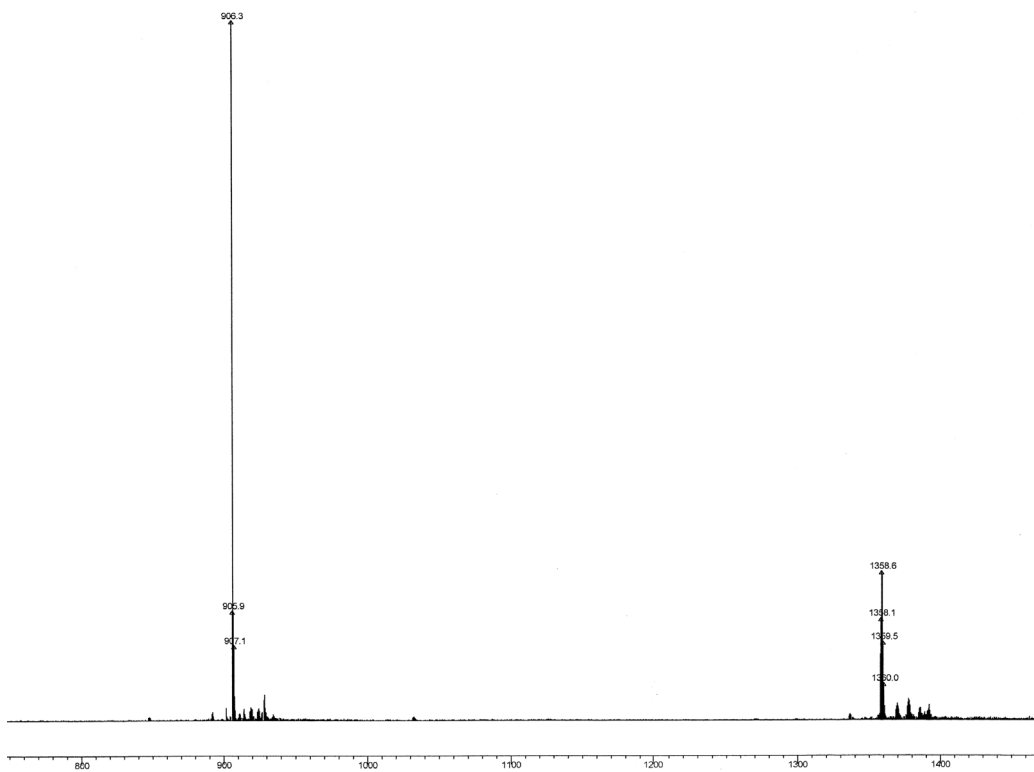

**Supplemental Figure 3:** MS (ESI, positive mode) for  $^{nat}\text{Ga}$ -Aquibepirin.

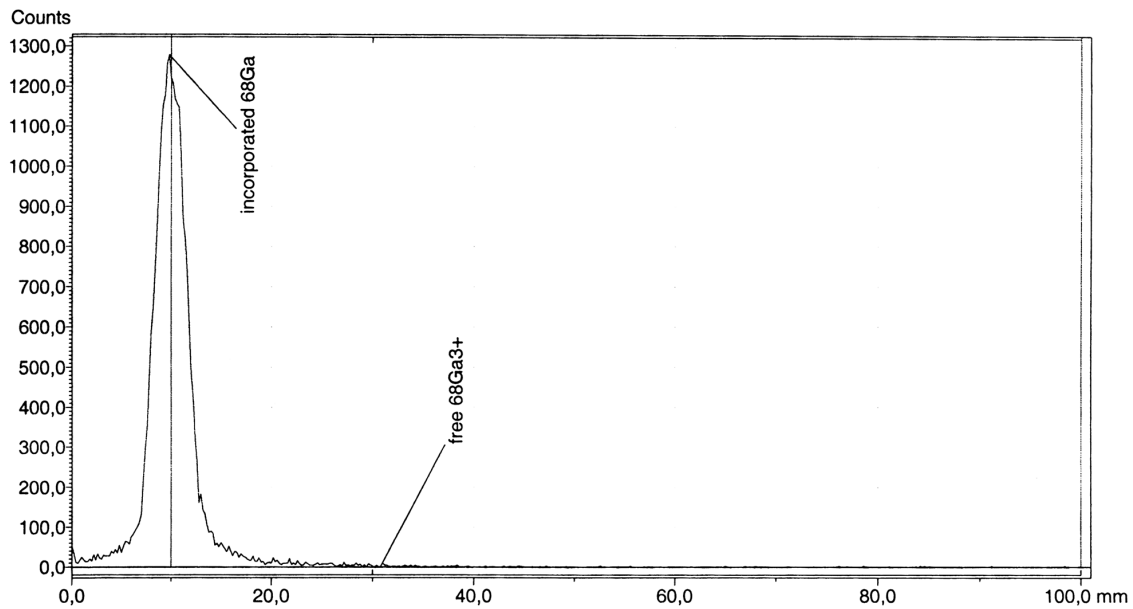

| Name              | Start (mm) | End (mm) | Retention (RF) | Height (Counts) | Area (Counts)  | %ROI (%)      | %Total (%)    |
|-------------------|------------|----------|----------------|-----------------|----------------|---------------|---------------|
| incorporated 68Ga | 0,0        | 30,0     | -0,0           | 1278,0          | 26325,0        | 99,32         | 99,32         |
| free 68Ga3+       | 30,0       | 100,0    | 0,2            | 11,0            | 180,0          | 0,68          | 0,68          |
| <b>2 Peaks</b>    |            |          |                |                 | <b>26505,0</b> | <b>100,00</b> | <b>100,00</b> |

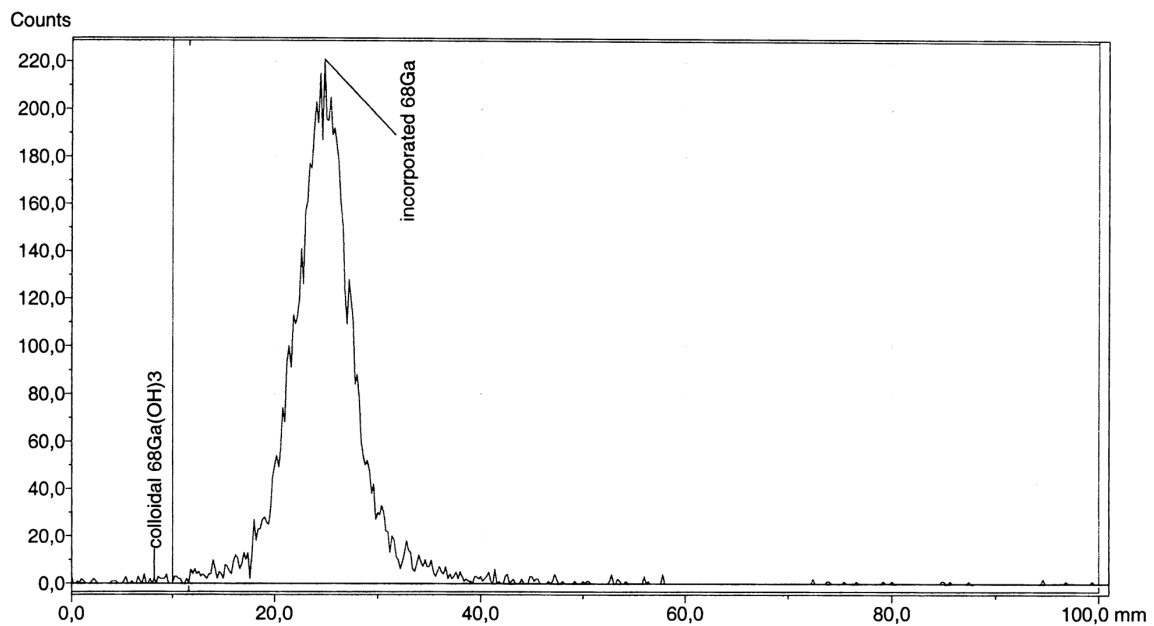

| Name                | Start (mm) | End (mm) | Retention (RF) | Height (Counts) | Area (Counts) | %ROI (%)      | %Total (%)    |
|---------------------|------------|----------|----------------|-----------------|---------------|---------------|---------------|
| colloidal 68Ga(OH)3 | 0,0        | 11,6     | -0,0           | 4,0             | 56,0          | 0,78          | 0,78          |
| incorporated 68Ga   | 11,6       | 100,0    | 0,2            | 221,0           | 7121,0        | 99,22         | 99,22         |
| <b>2 Peaks</b>      |            |          |                |                 | <b>7177,0</b> | <b>100,00</b> | <b>100,00</b> |

**Supplemental Figure 4:** Radio-TLC (Agilent ITLC-SG sheets) for  $^{68}\text{Ga}$ -Aquibepirin, using 0.1 M aq. trisodium citrate (top) and an 1:1 (v/v) mixture of 1 M aq.  $\text{NH}_4\text{OAc}$  and MeOH (bottom). The solvent front is at 100 mm.

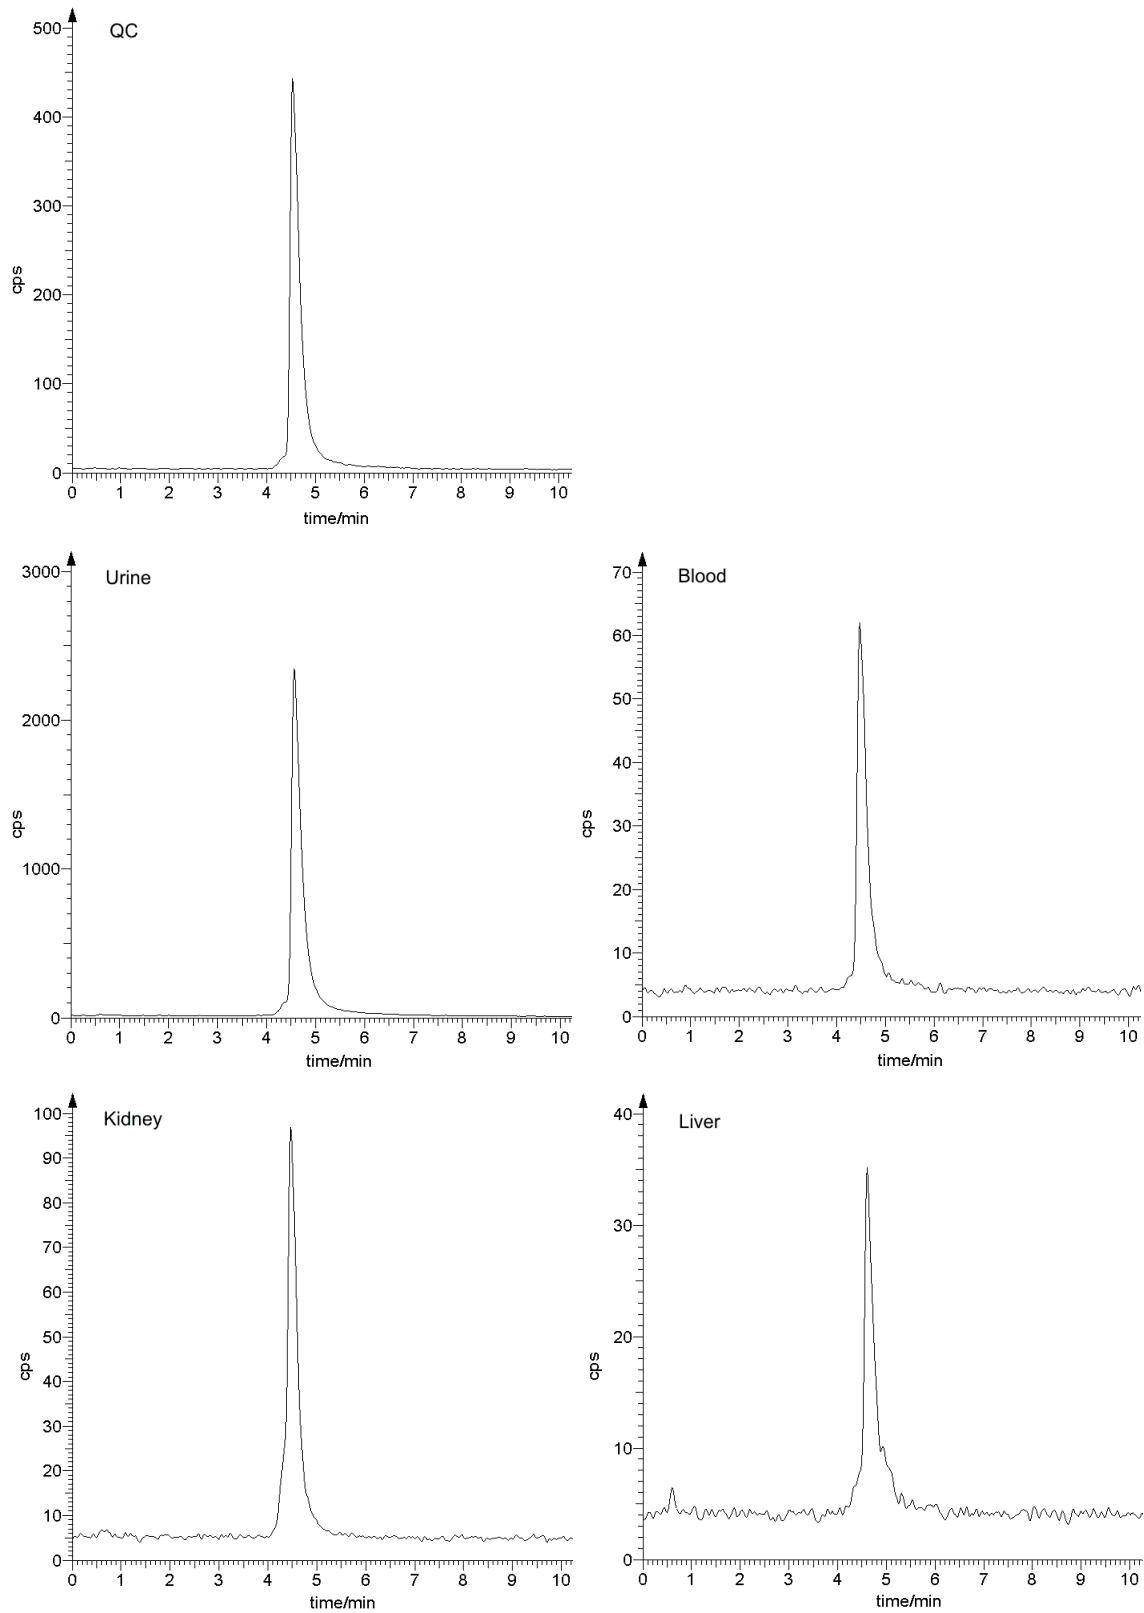

**Supplemental Figure 5:** Radio-HPLC (100×4.6 mm Merck Chromolith® column, flow 3 mL/min, 3-95% MeCN in water (both w/ 0.1% TFA) within 10 min) of  $^{68}\text{Ga}$ -Avebetrin (QC) as well as samples of body fluids and tissue extracts.

**Supplemental Table 1:** Biodistribution data (90 min p.i.) for <sup>68</sup>Ga-Aquibepirin without (n = 5) and with (n = 4) addition of 40 nmol (approx. 100 μg) of Aquibepirin.

| Organ/Tissue            | <sup>68</sup> Ga-Aquibepirin |                   | + 40 nmol (100 μg) cold |
|-------------------------|------------------------------|-------------------|-------------------------|
|                         | %ID/g                        | tumor/organ ratio |                         |
| blood                   | 0.24 ± 0.06                  | 10.6 ± 2.5        | 0.10 ± 0.03             |
| heart (myocard)         | 0.24 ± 0.05                  | 10.6 ± 1.8        | 0.13 ± 0.04             |
| lung                    | 0.67 ± 0.07                  | 3.7 ± 0.5         | 0.36 ± 0.08             |
| liver                   | 0.48 ± 0.07                  | 5.1 ± 0.5         | 0.36 ± 0.04             |
| spleen                  | 0.29 ± 0.04                  | 8.5 ± 0.7         | 0.19 ± 0.03             |
| pancreas                | 0.19 ± 0.04                  | 13.3 ± 2.2        | 0.07 ± 0.02             |
| stomach (empty)         | 0.51 ± 0.12                  | 4.9 ± 0.8         | 0.20 ± 0.05             |
| small intestine (empty) | 0.32 ± 0.05                  | 7.6 ± 0.7         | 0.22 ± 0.12             |
| large intestine (empty) | 0.60 ± 0.09                  | 4.1 ± 0.9         | 0.23 ± 0.05             |
| kidneys                 | 7.97 ± 1.49                  | 0.3 ± 0.0         | 6.04 ± 0.31             |
| muscle                  | 0.12 ± 0.02                  | 20.9 ± 2.4        | 0.04 ± 0.00             |
| tumor M21               | 2.42 ± 0.21                  |                   | 0.92 ± 0.13             |

**Supplemental Table 2:** Biodistribution data and tumor/organ ratios for <sup>68</sup>Ga-Avebetrin (90 min p.i., n = 6).

| Organ/Tissue            | <sup>68</sup> Ga-Avebetrin |                   |
|-------------------------|----------------------------|-------------------|
|                         | %ID/g                      | tumor/organ ratio |
| blood                   | 0.13 ± 0.04                | 25.4 ± 8.0        |
| heart (myocard)         | 0.49 ± 0.08                | 6.2 ± 0.8         |
| lung                    | 1.28 ± 0.18                | 2.4 ± 0.2         |
| liver                   | 1.80 ± 0.27                | 1.7 ± 0.2         |
| spleen                  | 2.12 ± 0.73                | 1.5 ± 0.4         |
| pancreas                | 0.32 ± 0.07                | 9.8 ± 1.7         |
| stomach (empty)         | 1.66 ± 0.21                | 1.8 ± 0.2         |
| small intestine (empty) | 1.92 ± 0.36                | 1.6 ± 0.4         |
| large intestine (empty) | 1.39 ± 0.29                | 2.2 ± 0.3         |
| kidneys                 | 3.47 ± 0.58                | 0.8 ± 0.1         |
| muscle                  | 0.21 ± 0.03                | 14.9 ± 2.0        |
| tumor M21               | 3.02 ± 0.30                |                   |
